# Supplementary material for: Significant role of host sialylated glycans in the infection and spread of severe acute respiratory syndrome coronavirus 2
Source: PLOS journal article supplement (doi:10.1371/journal.ppat.1010590), 2022-06-14

Fig. S3 The detection of sialic acid of the cells treated with or without neuraminidase

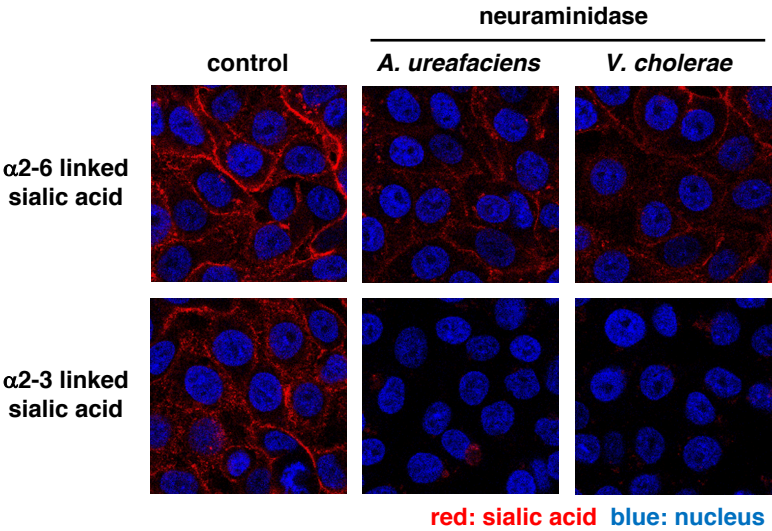

Supplement: S3 (10.1371/journal.ppat.1010590.s003) [file journal.ppat.1010590.s003]
